# Supplementary material
Source: MDPI journal article supplement (https://www.mdpi.com/2304-6740/11/3/115)
Supplement: s1 [file s1]

## Supporting information

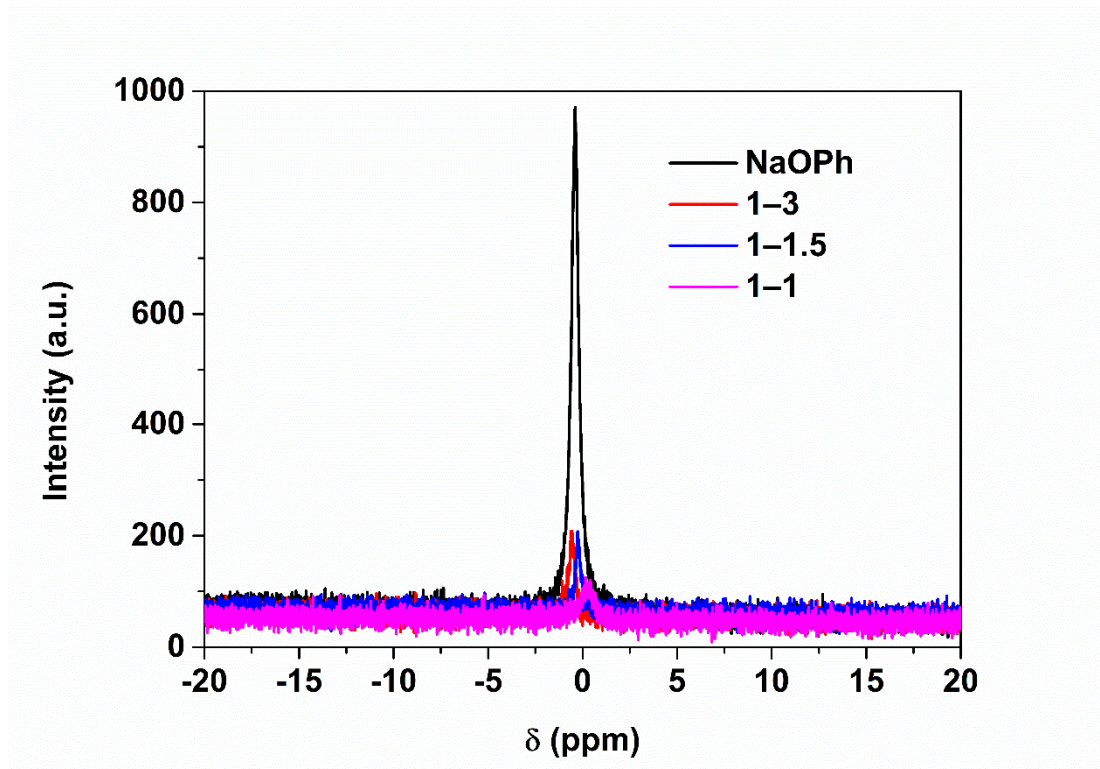

Figure S1. Liquid  $^{23}\text{Na}$  NMR characterizations on the reaction of  $\text{YCl}_3\text{-}n\text{NaOPh}$  ( $n=1, 1.5, 3$ ) with increase of the molar ratio of NaOPh.

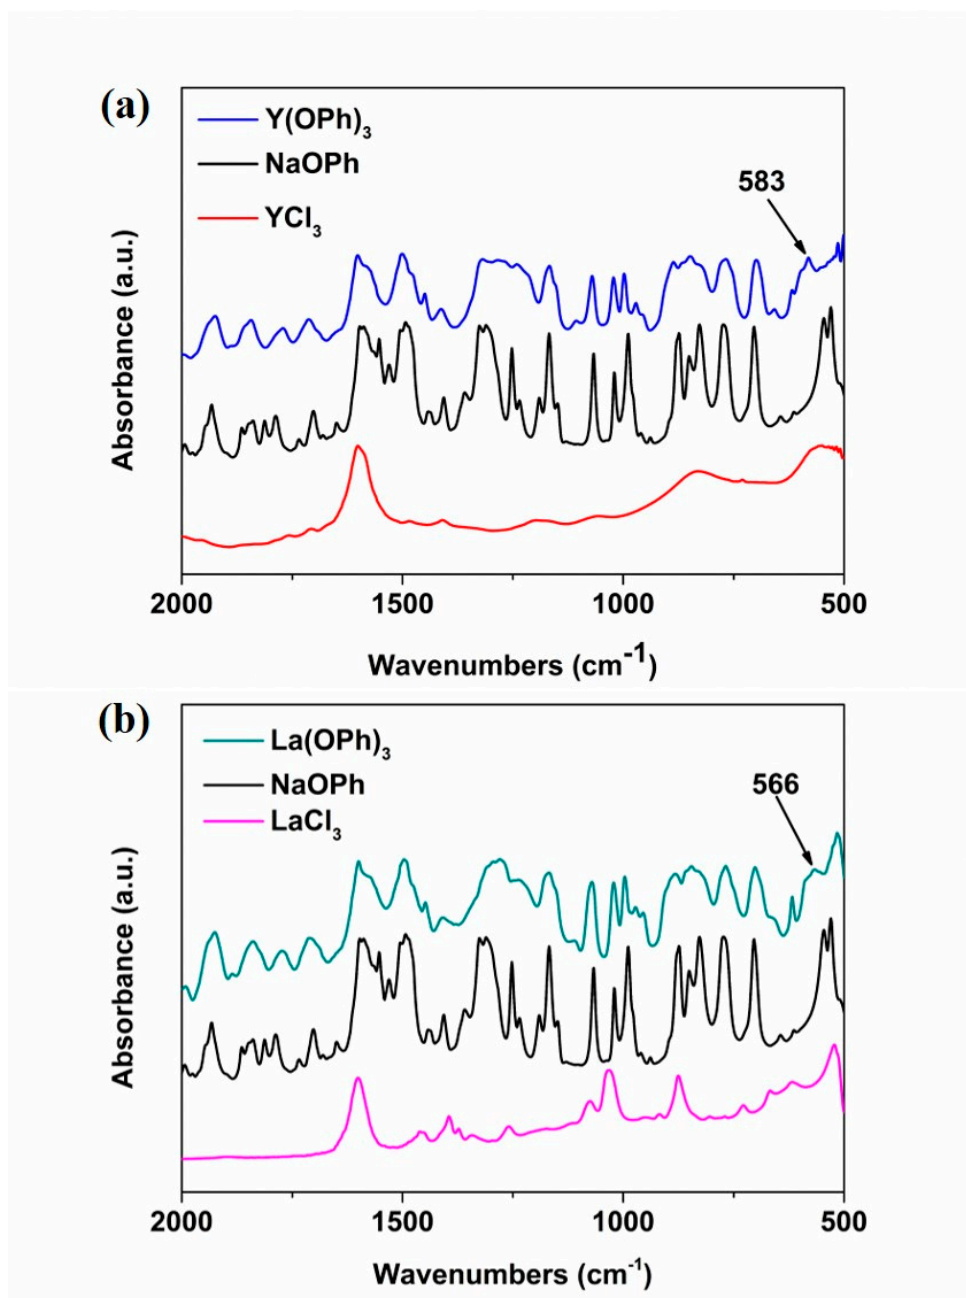

Figure S2. FT-IR spectra of (a) yttrium phenoxide and (b) lanthanum phenoxides compared with sodium phenoxide and their chlorides.

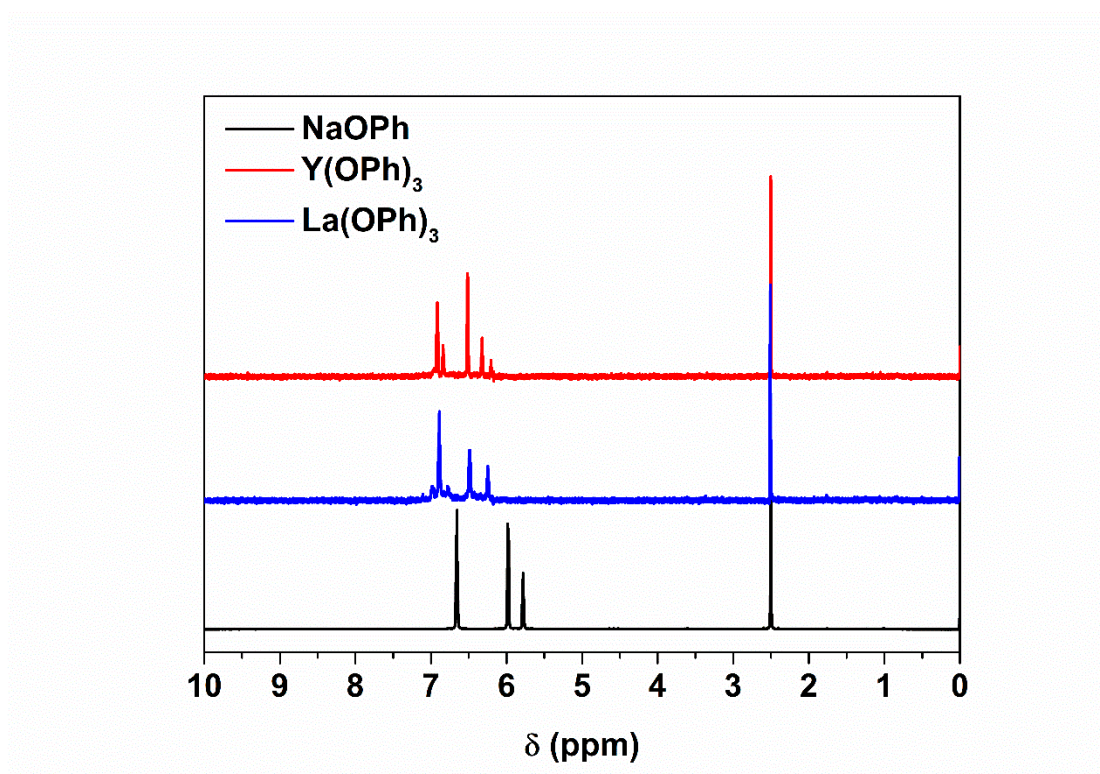

Figure S3.  $^1\text{H}$  NMR spectra of  $\text{Y(OPh)}_3$  and  $\text{La(OPh)}_3$  after removing solvent compared with  $\text{NaOPh}$ , respectively.

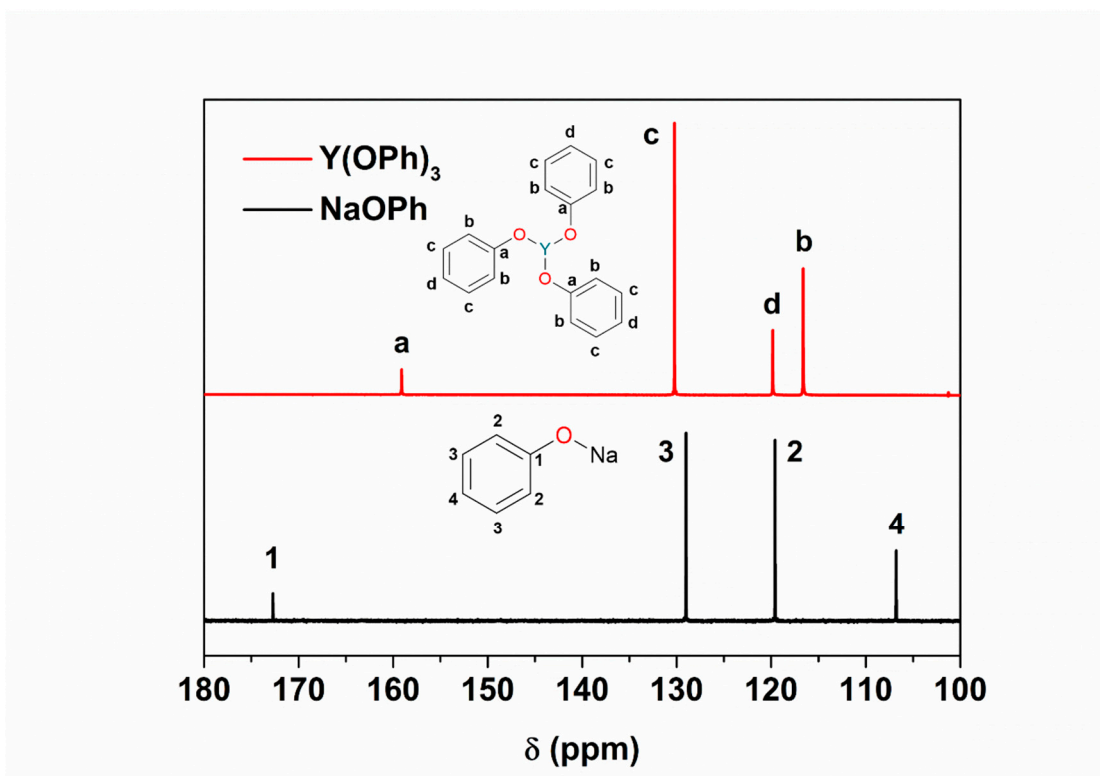

Figure S4.  $^{13}\text{C}$  NMR of  $\text{Y(OPh)}_3$  compared with  $\text{NaOPh}$ .

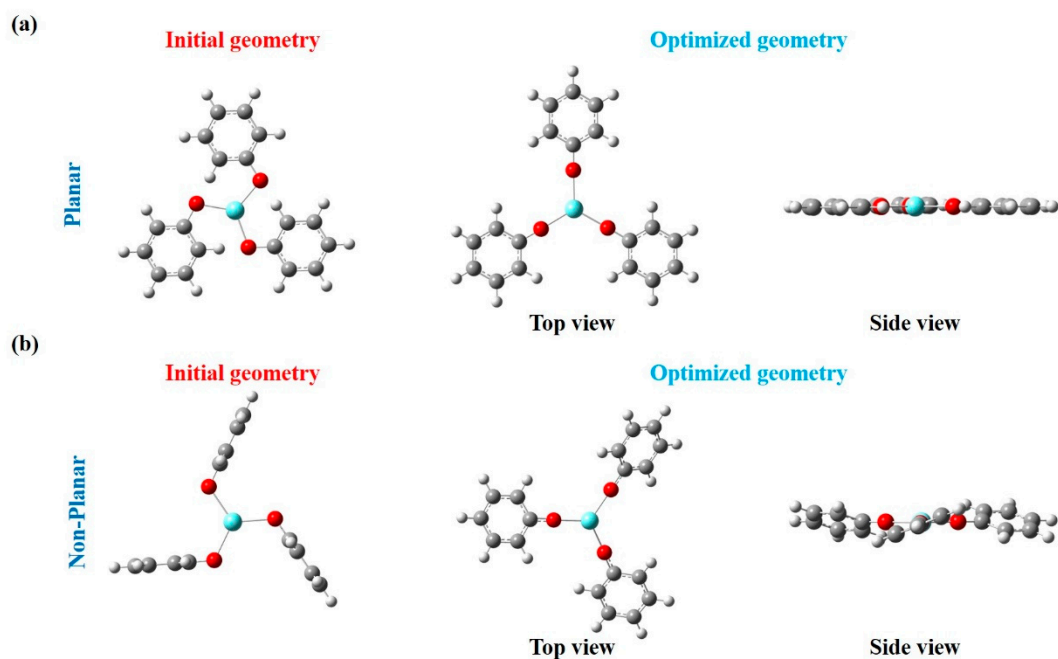

Figure S5. (a, b) Initial geometries (Parallel and Vertical) and optimized geometries (top view and side view) of yttrium phenoxide. (black: C; red: O; white: H; greenish-blue: Y.)

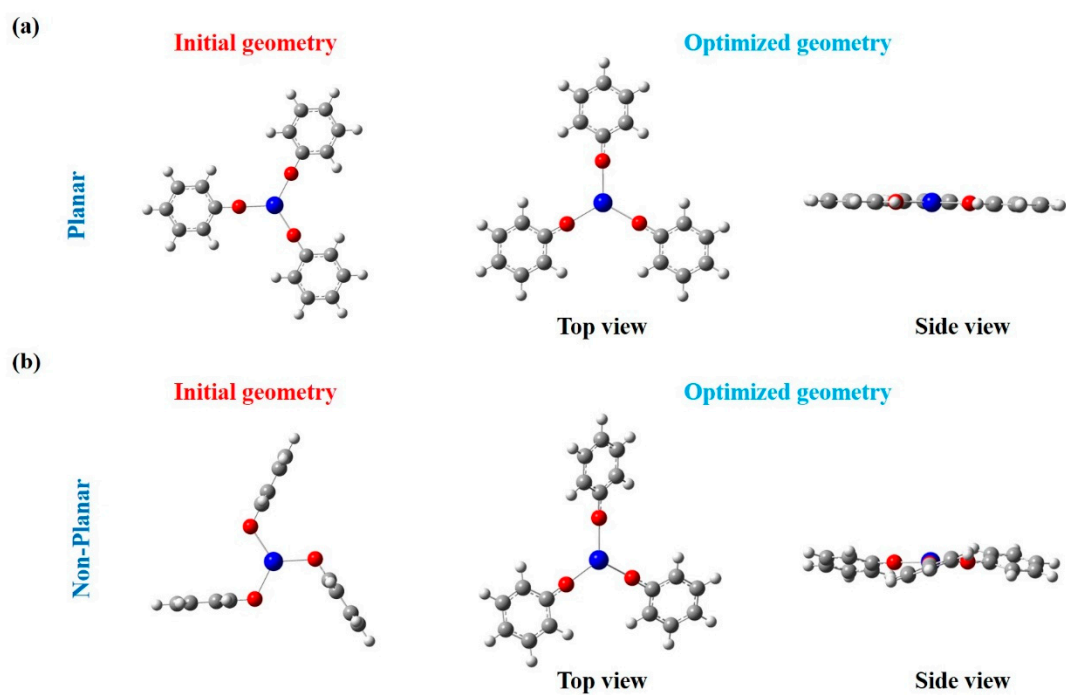

Figure S6. (a, b) Initial geometries (Parallel and Vertical) and optimized geometries (top view and side view) of lanthanum phenoxide. (black: C; red: O; white: H; blue: La.)

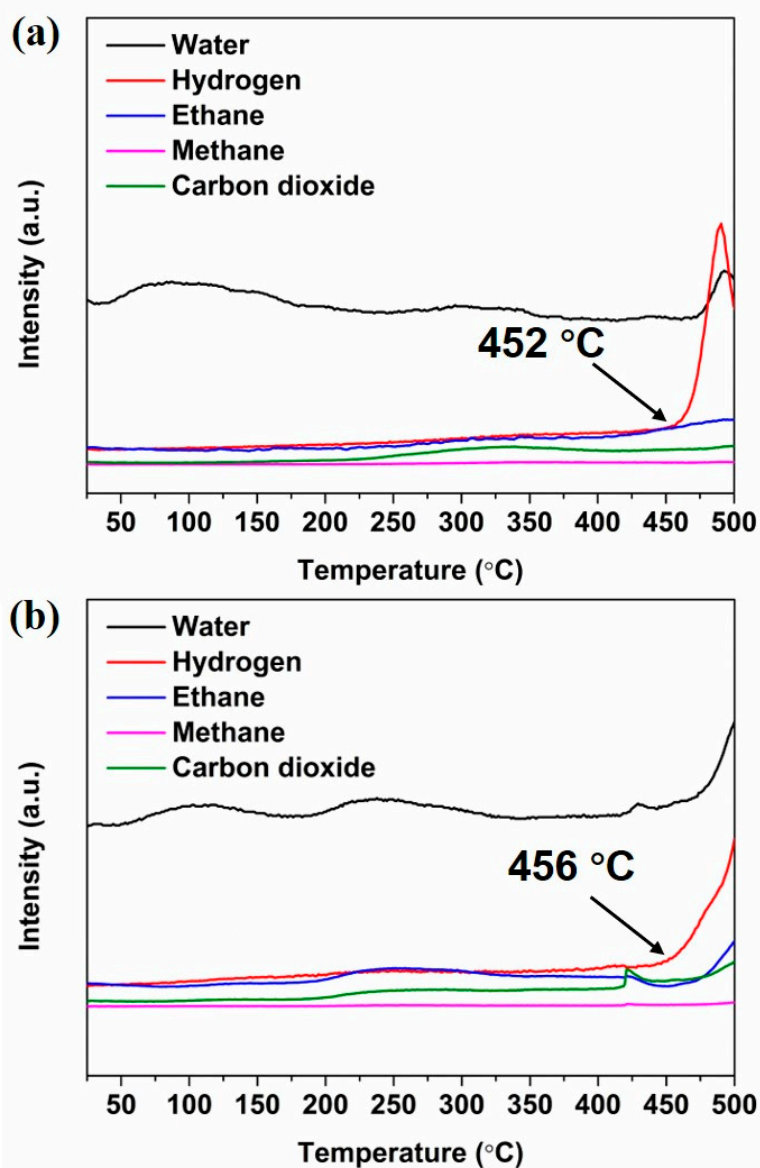

Figure S7. TPD-MS results of (a) yttrium phenoxide and (b) lanthanum phenoxide from 25 to 500 °C at a heating rate of 2 °C/min under Ar flow.

Table S1. The single point energies of two optimized structures of Y(OPh)<sub>3</sub>.

| Structure                   | Non-planar    | Planar        |
|-----------------------------|---------------|---------------|
| Energy/kJ mol <sup>-1</sup> | -2518479.4650 | -2518479.0016 |
| Charge of Y                 | 2.152         | 2.151         |
| Charge of O                 | -0.898        | -0.899        |
| HOMO/eV                     | -6.0469       | -6.0551       |
| LUMO/eV                     | -2.4735       | -2.4637       |

Table S2. The single point energies of two optimized structures of La(OPh)<sub>3</sub>.

| Structure                   | Non-planar    | Planar        |
|-----------------------------|---------------|---------------|
| Energy/kJ mol <sup>-1</sup> | -2500734.6118 | -2500734.5769 |
| Charge of La                | 2.277         | 2.276         |
| Charge of O                 | -0.927        | -0.928        |
| HOMO/eV                     | -5.9111       | -5.9103       |
| LUMO/eV                     | -2.5070       | -2.4985       |

Table S3. Comparison of Y(III) and La(III) phenoxides between the present study and previous research.

|                          | Y(III) and La(III) phenoxides in the present study                                           | Y(III) and La(III) phenoxides in the previous study                                   |
|--------------------------|----------------------------------------------------------------------------------------------|---------------------------------------------------------------------------------------|
| <b>Organic anion</b>     | Unsubstituted phenoxide group                                                                | Substituted phenoxide groups                                                          |
| <b>Synthetic process</b> | The synthetic process was characterized by quasi in situ $^1\text{H}$ NMR and UV-Vis spectra | The final products were well characterized.                                           |
| <b>Neutral ligand</b>    | Neutral ligands (ethanol) have been completely removed                                       | Neutral ligands generally remain in the system and can stable the molecular structure |
